# Supplementary material for: Peptide vaccine immunotherapy biomarkers and response patterns in pediatric gliomas
Source: JCI journal article supplement (doi:10.1172/jci.insight.98791), 2018-04-04
Supplement: sd1 [file 1]

MR/PR vs SD

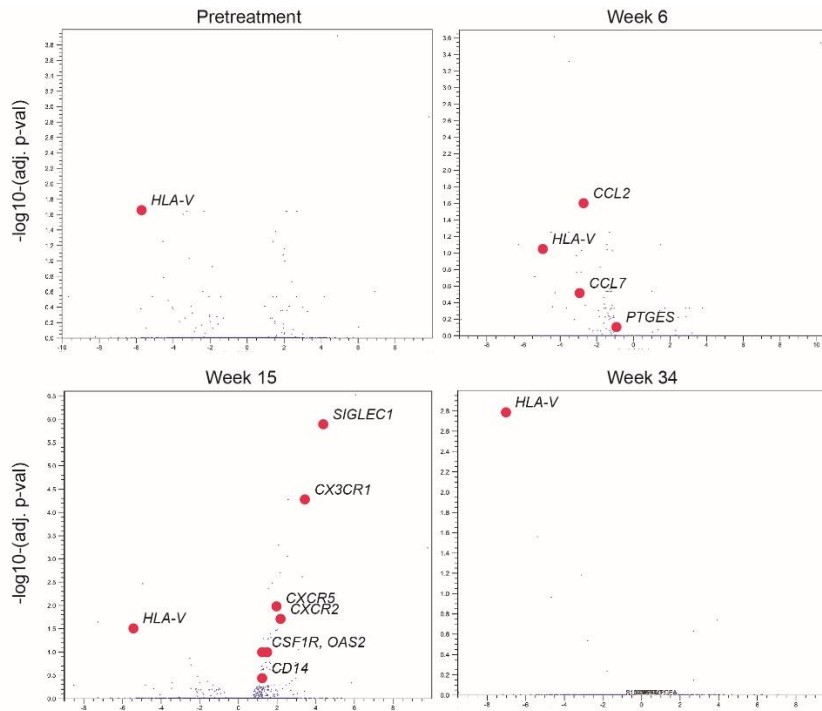

Near-CR/CR vs SD

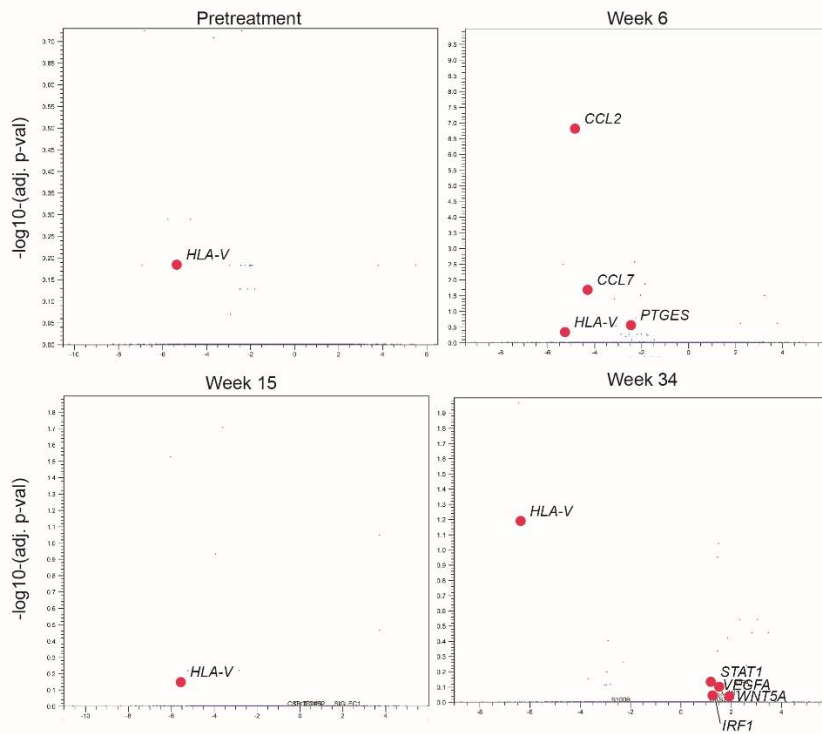

**Figure S1. Differential expression analysis reveals several immune related genes associated with response at various time points.** Volcano plots comparing fold-change (x-axis) and adjusted p-value (y-axis, edgeR), for 36,410 expressed genes at weeks 0, 6, 15, and 34 between PR (n=3 patients) v.s. SD (n=7) and CR (n=2) vs. SD (n=7). Specific immune-related genes are highlighted in red.

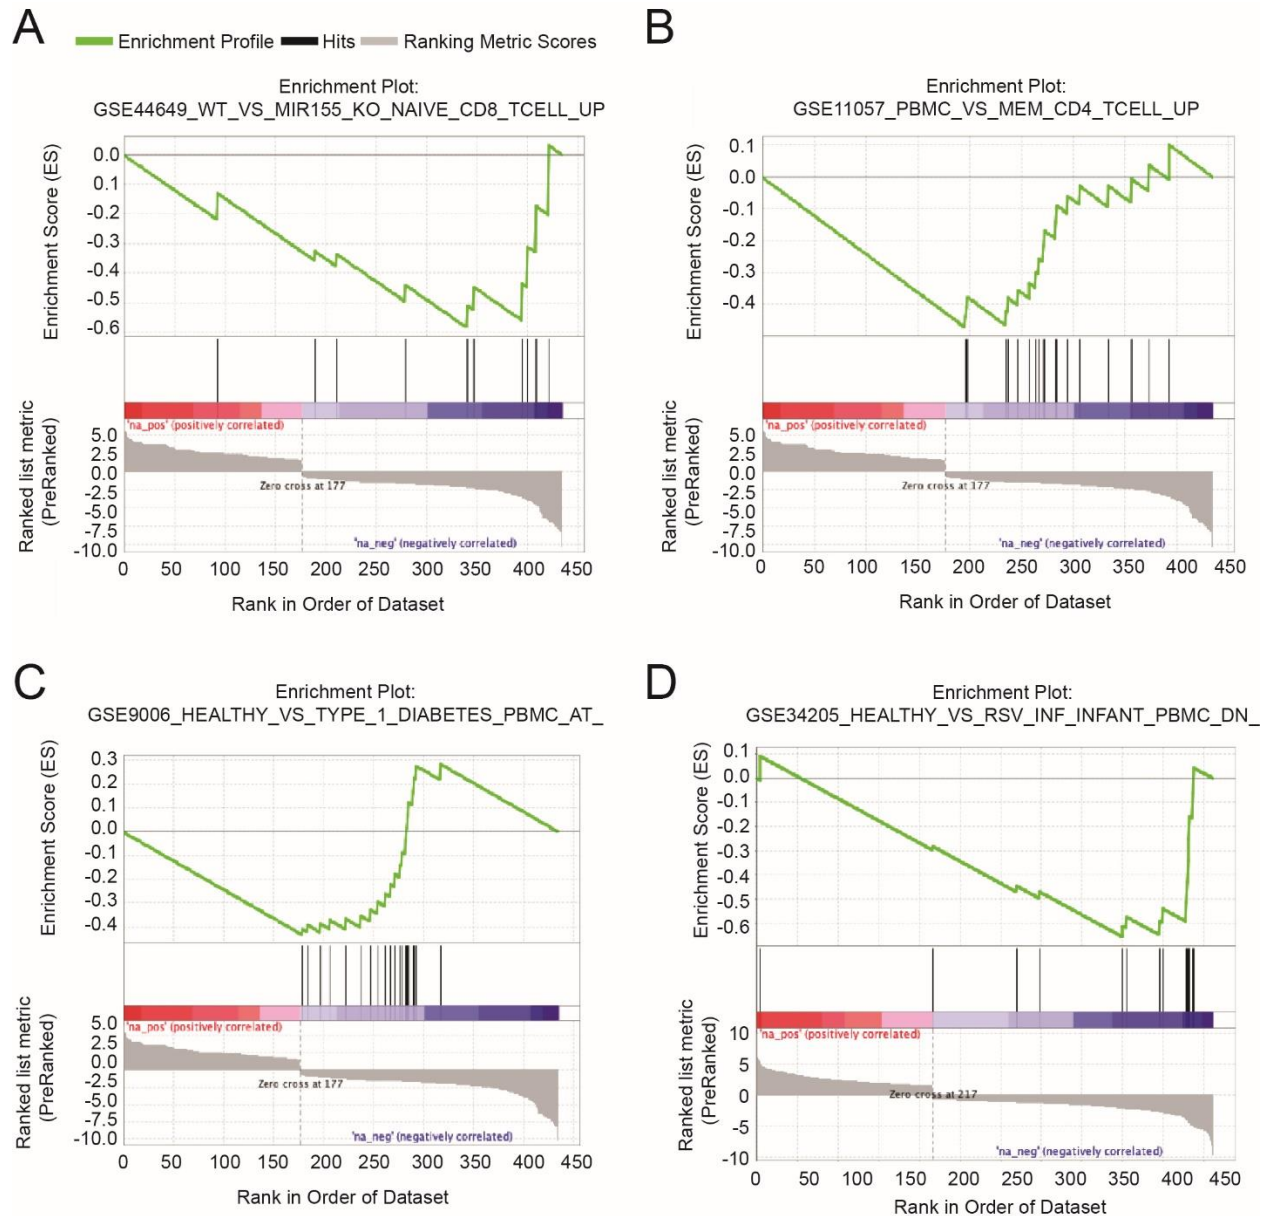

**Figure S2. Gene set enrichment analysis at week 0.** (A-C) In enrichment plots genes are ranked by signal/noise ratio according to their differential expression between SD and CR patients. Genes in the gene sets indicated on top of each figure are marked with vertical bars, and the enrichment score is shown in green. (D) Figure as in (A-C), with genes ranked according to differential expression between PR vs SD patients.

A

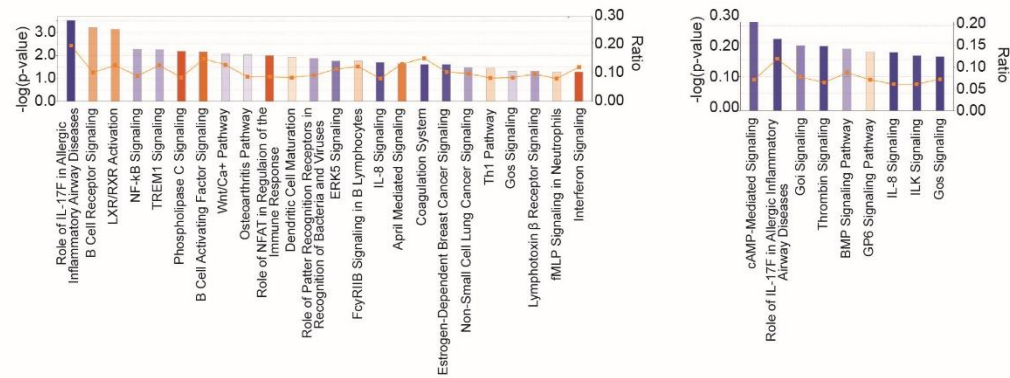

B

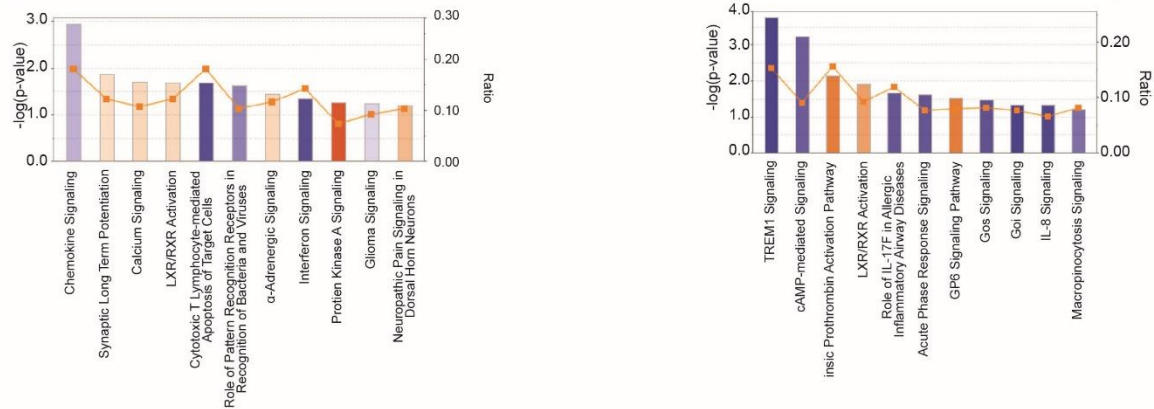

C

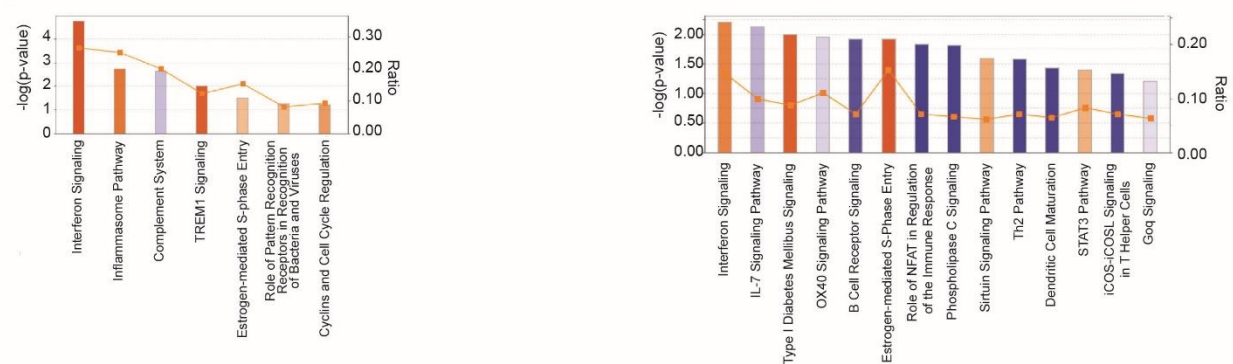

**Figure S3. Induced and repressed pathways associated with treatment response at different time points.** (A) Left: Significance (y-axis, Fisher's exact test) of pathway enrichment for genes differentially expressed between PR and SD patients at week 0. The ratio of differentially expressed genes to the total number of genes in the pathway is given by the orange line. The average expression of genes in each pathway is indicated by color (z-score). Right: Same as on the left for genes differentially expressed between CR and SD patients. (B) Figure as in (A) for week 6. (C) Figure as in (A) for week 15.

A

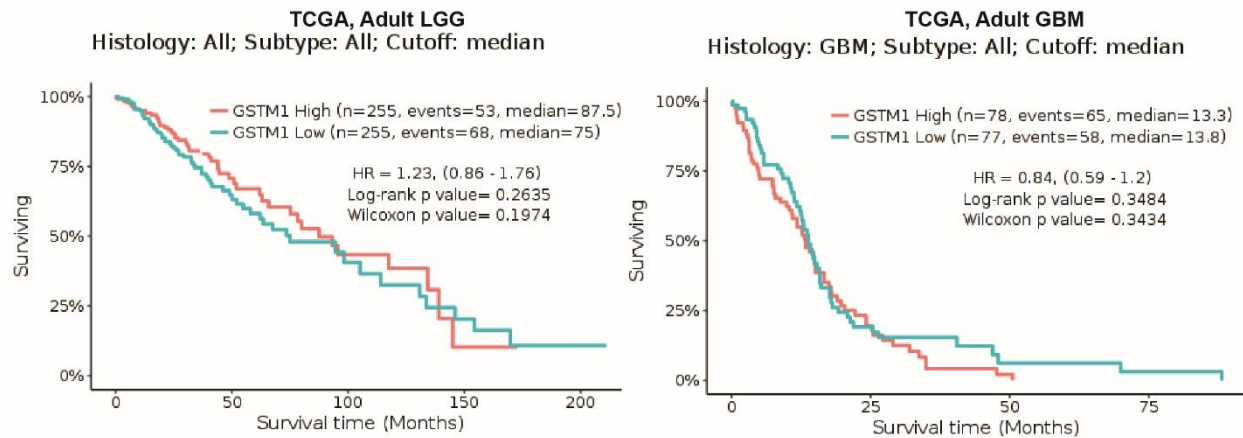

B

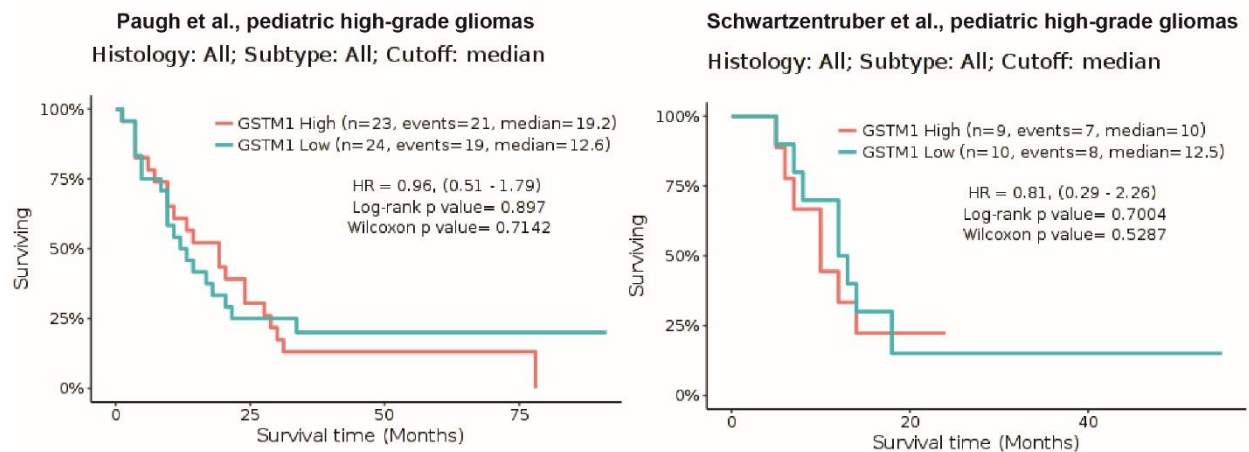

**Figure S4. Survival analysis for *GSTM1* expression in public pediatric and adult glioma datasets.** (A) Left: Survival analysis based on TCGA RNA-seq data of LGG tissues (n=510 adult patients). The two groups were determined based on median *GSTM1* expression. HR= Hazard Ratio. Right: Figure as in (A) for n=155 adult glioblastoma patients. (B) Left: Figure as in (A) for n=47 pediatric glioblastoma patients. Right: Figure as in (A) for n=19 pediatric glioblastoma patients.

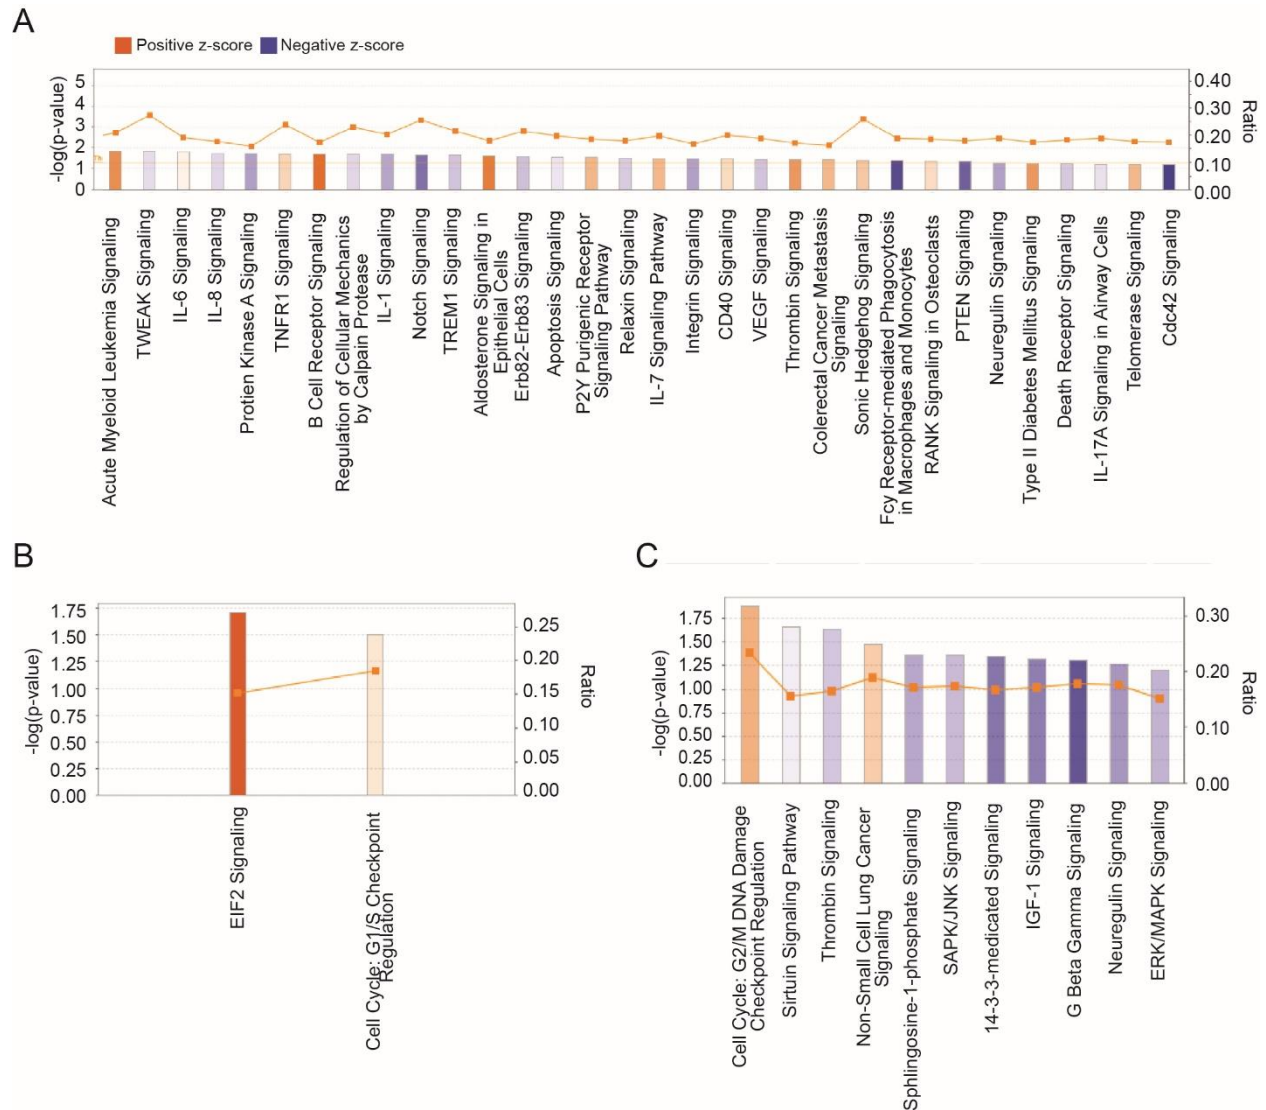

**Figure S5. Pathway analysis of genes correlating with ELISPOT counts.** (A) Significance (y-axis, Fisher's exact test) of pathway enrichment for genes correlating with Survivin ELISPOT counts. The ratio of differentially correlated genes to the total number of genes in the pathway is given by the orange line. The average correlation z-score of genes in each pathway is indicated by color. (A) Additional pathways (in addition to Figure 5A) correlating with Survivin ELISPOT counts (B) Pathways correlating with IL-13Ra2 ELISPOT counts. (C) Pathways correlating with EphA2 ELISPOT counts.



|    | HLA-V | GSTM1 | Week 6<br>Monocyte | Week 15<br>Monocyte | Week 34<br>STAT1/IFN | Week 34<br>Poly-ICLC |
|----|-------|-------|--------------------|---------------------|----------------------|----------------------|
| CR | ↓     | ↓     | ↓                  | ↓                   | ↑                    | ↑                    |
| PR | ↓     | ↑     | ↓                  | ↑                   | ↓                    | ↑                    |
| SD | ↑     | ↑     | ↑                  | —                   | —                    | —                    |

**Figure S6. Summary of potential biomarkers of vaccination response at different time points.** Arrows pointing up indicate an induction of the indicated gene, pathway/cell type (columns) in each of the three groups (rows). Time points are indicated below the markers. If no time point is mentioned, the markers are predictive at every given time point including week 0 (pre-treatment).

| Best Response: PR vs SD |                                               |                |                                               |                    |                                                 |
|-------------------------|-----------------------------------------------|----------------|-----------------------------------------------|--------------------|-------------------------------------------------|
| Week 0                  |                                               | Week 6         |                                               | Week 15            |                                                 |
| Activated               | Inhibited                                     | Activated      | Inhibited                                     | Activated          | Inhibited                                       |
| 2-aminopurine           | leukotriene D4                                | 2-aminopurine  | leukotriene D4                                | Lipopolysaccharide | Etanercept                                      |
| prednisolone            | Inosine                                       | Prednisolone   | Inosine                                       | IFNA2              | Ptprd                                           |
| anakinra                | Bromodeoxyuridine                             | Anakinra       | Bromodeoxyuridine                             | IRF7               | PDCD1                                           |
| alefacept               | Uric acid                                     | Alefacept      | Uric acid                                     | IFNG               | GPS2                                            |
| infliximab              | Isobutyl-methylxanthine                       | Infliximab     | Isobutyl-methylxanthine                       | Interferon alpha   | Garcinol                                        |
| asoprisnil              | E. coli lipopolysaccharide                    | Asoprisnil     | E. coli lipopolysaccharide                    | CSF2               | Immunoglobulin                                  |
| CDK4/6                  | E. coli B4 lipopolysaccharide                 | CDK4/6         | E. coli B4 lipopolysaccharide                 | IFNL1              | miR-34a-5p<br>(and other miRNAs w/seed GGCAGUG) |
| CD3                     | Peptidoglycan                                 | CD3            | Peptidoglycan                                 | PRL                |                                                 |
| NPM1                    | 17α-ethinylestradiol                          | NPM1           | 17α-ethinylestradiol                          | IRF3               | FSH                                             |
| Ptprd                   | Linoleic acid                                 | Ptprd          | Linoleic acid                                 | TGM2               | DNASE2                                          |
| MKL2                    | Oblimersen                                    | MKL2           | Oblimersen                                    | STAT1              | Let-7                                           |
| EGLN                    | Salmonella minnesota R595 lipopolysaccharides | EGLN           | Salmonella minnesota R595 lipopolysaccharides | Poly rI:rC-RNA     | Baicalein                                       |
| 26s Proteasome          |                                               | 26s Proteasome |                                               | IL21               | PTX3                                            |
| Immunoglobulin          | PI3K (complex)                                | Immunoglobulin | PI3K (complex)                                | IRF1               | DYRK1A                                          |
| ACKR2                   | ERK1/2                                        | ACKR2          | ERK1/2                                        | SMARCA4            | Fontolizumab                                    |
|                         | P38 MAPK                                      |                | P38 MAPK                                      | IFN Beta*          | SB203580                                        |
|                         | TCR*                                          |                | TCR*                                          |                    |                                                 |

| Best Response: CR vs SD                          |              |                                                  |              |                     |                    |
|--------------------------------------------------|--------------|--------------------------------------------------|--------------|---------------------|--------------------|
| Week 0                                           |              | Week 6                                           |              | Week 15             |                    |
| Activated                                        | Inhibited    | Activated                                        | Inhibited    | Activated           | Inhibited          |
| PD98059                                          | Pka          | PD98059                                          | Pka          | CCND1               | Rb                 |
| SB203580                                         | LCN2         | SB203580                                         | LCN2         | PD98059             | RBM5               |
| SFTPA1                                           | CHADL        | SFTPA1                                           | CHADL        | CD3                 | SCAP               |
| Salicylic acid                                   | SELPLG       | salicylic acid                                   | SELPLG       | CD28                | Aldesleukin        |
| miR-199a-5p<br>(and other miRNAs w/seed CCAGUGU) | RNASE1       | miR-199a-5p<br>(and other miRNAs w/seed CCAGUGU) | RNASE1       | RICTOR              | Nitroarginine      |
|                                                  | SELP         |                                                  | SELP         | KDM5A               | Butyric acid       |
| NCSTN                                            | TYROBP       | NCSTN                                            | TYROBP       | Dihydrotestosterone | FGF2               |
| COL18A1                                          | BET          | COL18A1                                          | BET          | RABL6               | Tnf (family)       |
| APOE                                             | HRG          | APOE                                             | HRG          | INSIG1              | TLR7               |
| let-7a-5p<br>(and other miRNAs w/seed GAGGUAG)   | Fenamic acid | let-7a-5p<br>(and other miRNAs w/seed GAGGUAG)   | fenamic acid | Methotrexate        | ADORA2A            |
|                                                  | Carboplatin  |                                                  | carboplatin  | Alefacept           | Ca2+               |
| U0126                                            | Triamterene  | U0126                                            | triamterene  | TSC2                | Tretinoin          |
| CA4                                              | Iomustine    | CA4                                              | Iomustine    | CD 437              | PDGF BB            |
| Diphenyleneiodonium                              | Bezafibrate  | Diphenyleneiodonium                              | bezafibrate  | Igm                 | SAMSN1             |
| Bisindolylmaleimide I                            | Tnf (family) | Bisindolylmaleimide I                            | Tnf (family) | AREG                | IL18               |
| miR-1-3p<br>(and other miRNAs w/seed GGAAUGU)    |              | miR-1-3p<br>(and other miRNAs w/seed GGAAUGU)    | Tnf (family) | mir-1               | NFKB1              |
|                                                  |              |                                                  |              | EP400               | Dimethyl sulfoxide |
|                                                  |              | ABCB4                                            |              | TBX2                | RNASE2             |
|                                                  |              | ABCB4                                            |              | Aspirin             | Poly rI:rC-RNA     |

**Table ST1. Predicted upstream regulators of our gene pathways at time points 0, 6, 15 using IPA software.** Analysis was performed based on up-/downregulated genes between groups.
